# Supplementary material for: Near-infrared remote sensing of Los Angeles trace gas distributions from a mountaintop site
Source: Copernicus journal article supplement (doi:10.5194/amt-7-713-2014), 2014-03-06
Supplement: Supplementary file 1 [file amt-7-713-2014-supplement.pdf]

1 **Supplemental Material Table 1. CLARS FTS Measurement Sequence**

| index | Target Coordinate    |                       |                     | Target Name      | Measurement Mode  |
|-------|----------------------|-----------------------|---------------------|------------------|-------------------|
|       | Latitude<br>(degree) | Longitude<br>(degree) | Altitude<br>(meter) |                  |                   |
| 0     | 34.221               | -118.057              | 1673                | Spectralon®      | SVO <sup>1</sup>  |
| 1     | 34.069               | -117.390              | 340                 | Fontana          | LABS <sup>2</sup> |
| 2     | 34.081               | -117.589              | 325                 | Rancho Cucamonga | LABS              |
| 3     | 33.951               | -117.392              | 265                 | Riverside        | LABS              |
| 4     | 33.877               | -117.416              | 403                 | Lake Matt        | LABS              |
| 5     | 33.962               | -117.573              | 190                 | Norco            | LABS              |
| 6     | 34.043               | -117.725              | 253                 | Pomona           | LABS              |
| 7     | 34.120               | -117.868              | 217                 | 210 Bend         | LABS              |
| 8     | 33.868               | -117.601              | 261                 | Corona           | LABS              |
| 0     | 34.221               | -118.057              | 1673                | Spectralon®      | SVO               |
| 9     | 33.863               | -117.776              | 97                  | North OC         | LABS              |
| 10    | 34.000               | -117.883              | 151                 | 60 Industry      | LABS              |
| 11    | 34.110               | -117.969              | 134                 | SantaFe Dam      | LABS              |
| 12    | 33.678               | -117.864              | 12                  | OC airPort       | LABS              |
| 13    | 33.800               | -117.883              | 47                  | Angels Stadium   | LABS              |
| 0     | 34.221               | -118.057              | 1673                | Spectralon®      | SVO               |
| 14    | 33.722               | -117.975              | 12                  | Huntington beach | LABS              |
| 15    | 33.910               | -118.006              | 57                  | La Mirada        | LABS              |
| 16    | 34.030               | -118.025              | 77                  | 605 and 60       | LABS              |
| 17    | 34.141               | -118.042              | 155                 | Santa Anita Park | LABS              |
| 18    | 33.821               | -118.195              | 11                  | Long Beach 405   | LABS              |
| 19    | 33.930               | -118.158              | 30                  | Downey           | LABS              |
| 20    | 34.048               | -118.116              | 128                 | ELA water        | LABS              |
| 0     | 34.221               | -118.057              | 1673                | Spectralon®      | SVO               |
| 21    | 33.810               | -118.368              | 66                  | Palos Verdes     | LABS              |
| 22    | 33.990               | -118.400              | 8                   | Marina Del Rey   | LABS              |
| 23    | 34.054               | -118.305              | 58                  | Down Town Far    | LABS              |
| 24    | 34.102               | -118.234              | 124                 | Down Town Near   | LABS              |
| 25    | 34.093               | -118.470              | 257                 | Santa Monica     | LABS              |
| 26    | 34.154               | -118.273              | 160                 | Glendale         | LABS              |
| 27    | 34.170               | -118.165              | 293                 | west Pasadena    | LABS              |
| 28    | 34.141               | -118.353              | 170                 | Universal City   | LABS              |

2 <sup>1</sup>Spectralon® Viewing Observations

3 <sup>2</sup>Los Angeles Basin Surveys

4

5

6

7

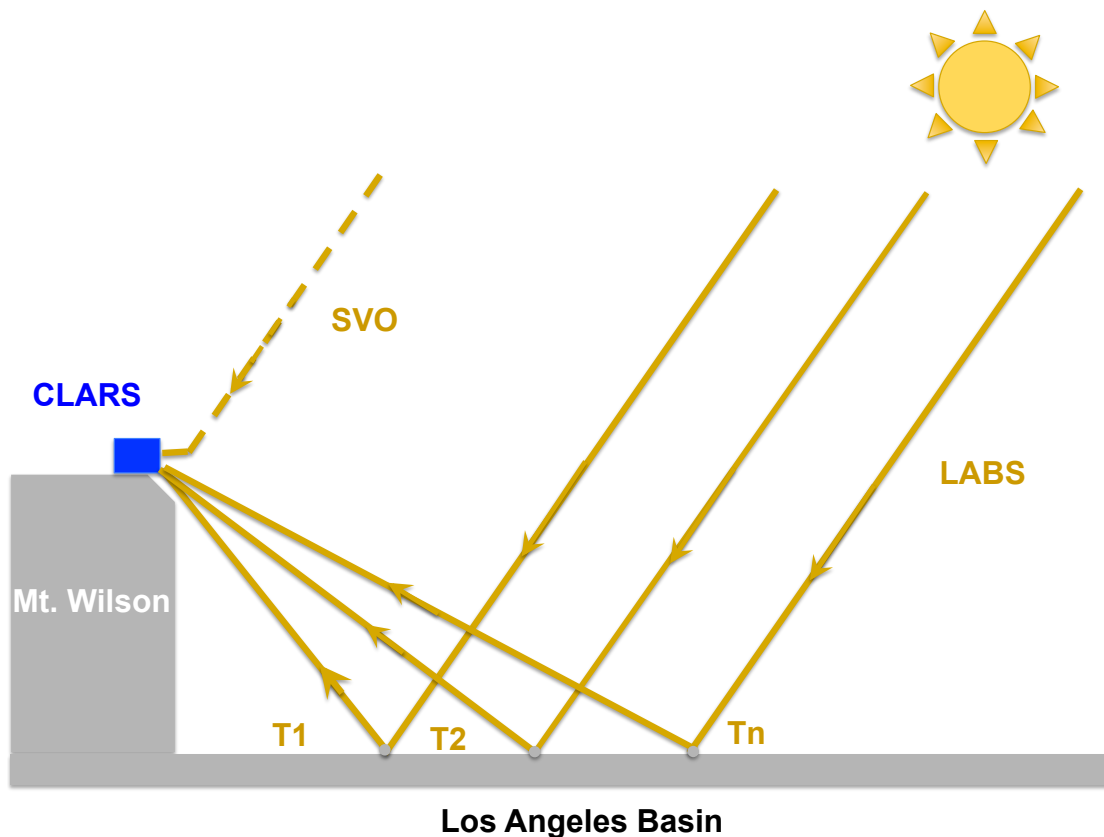

1

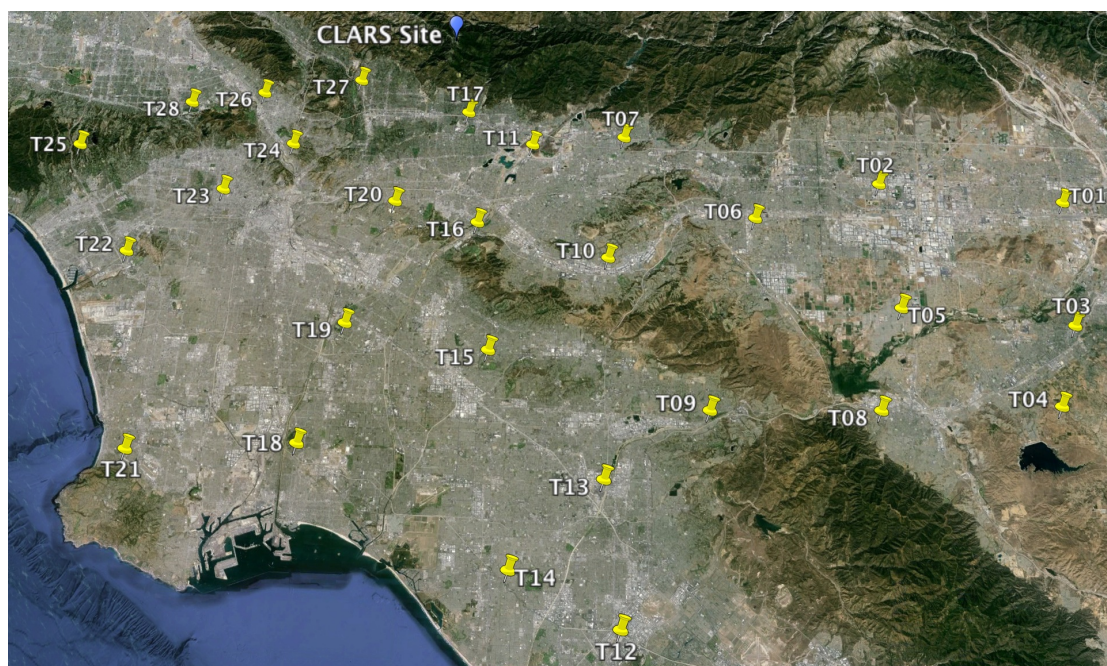

2

3 **Supplemental Material Figure 1.** Upper panel: Schematic diagram of spectrometer (altitude  
 4 of 1.7 km) viewing geometry for Los Angeles Basin Surveys (LABS) and Spectralon®  
 5 Viewing Observations; lower panel: the target site location of CLARS-FTS observations in a  
 6 measurement sequence over Los Angeles Basin. Blue balloon indicates CLARS site; Yellow  
 7 pins showed the target site location. The measurement sequence is being repeated daily for  
 8 ~5-8 times. The sequences can be changed to accommodate the needs of special observations.

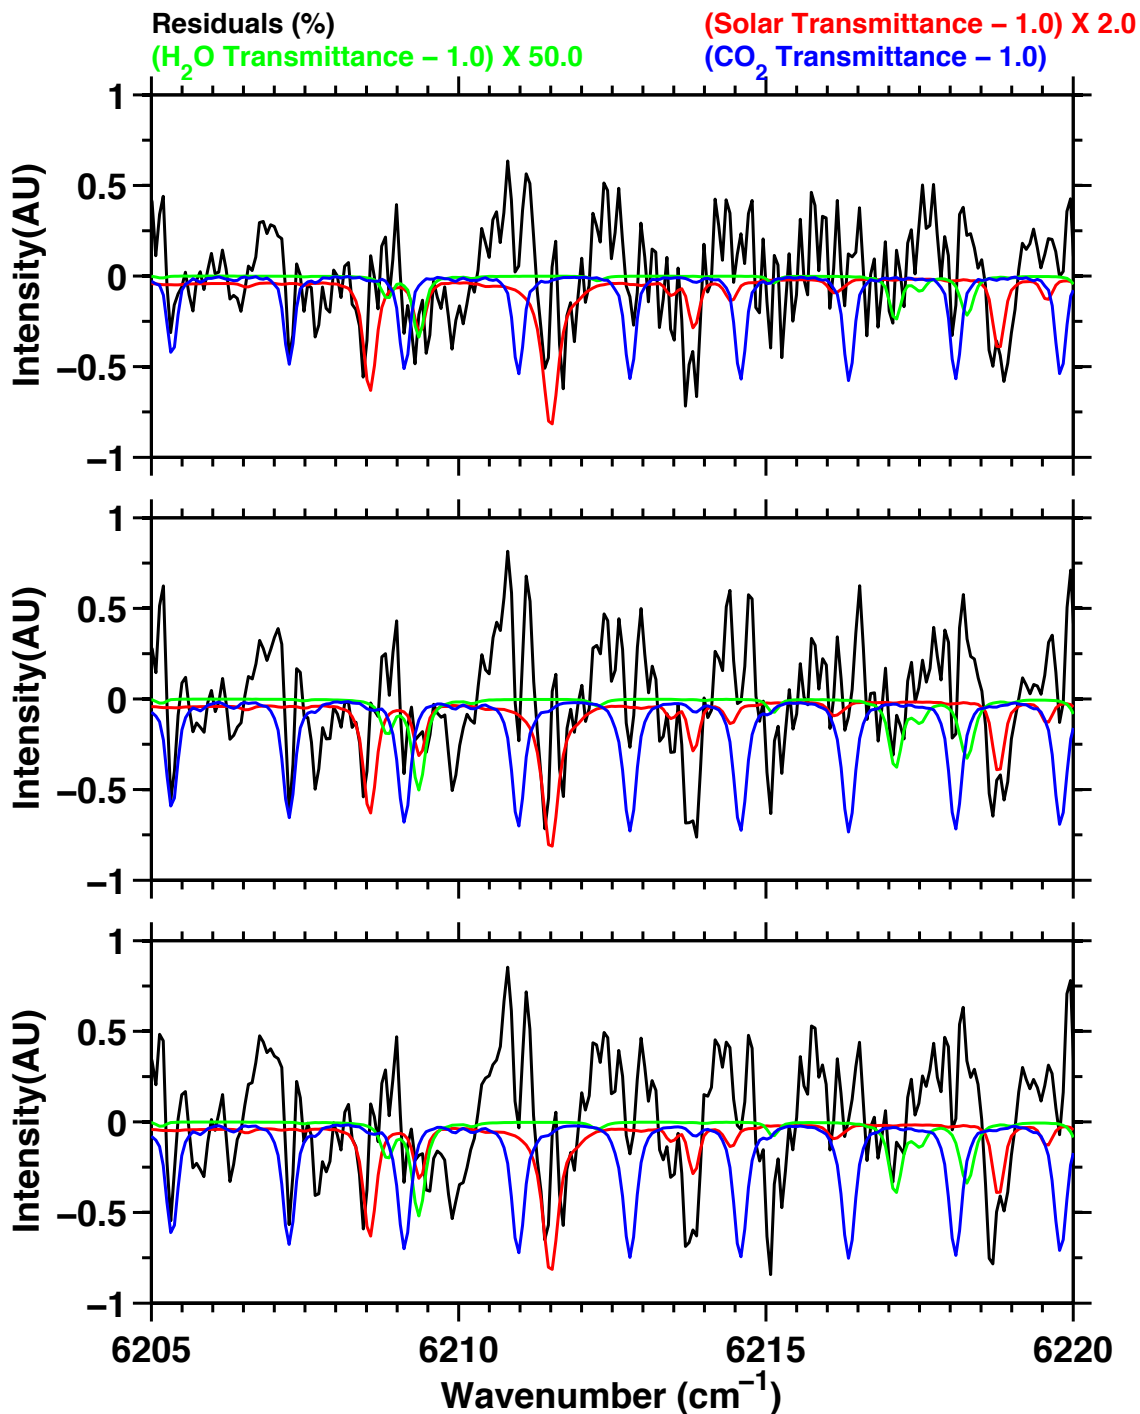

1

2 **Supplemental Material Figure 2.** Zoom-in view of MW6220 spectral fitting residuals  
3 (black curve) and scaled transmittances of solar spectrum (red curve), major interfering trace  
4 gases (green curve: H<sub>2</sub>O spectral features), and CO<sub>2</sub> spectral features (blue curve) within the  
5 spectral segments. (top panels) for the measurements over CLARS site; (middle panels) for  
6 the measurements along the light path of pointing at the Santa Anita Race Track; and (bottom  
7 panels) for the measurements along the light path of pointing at the west Pasadena.

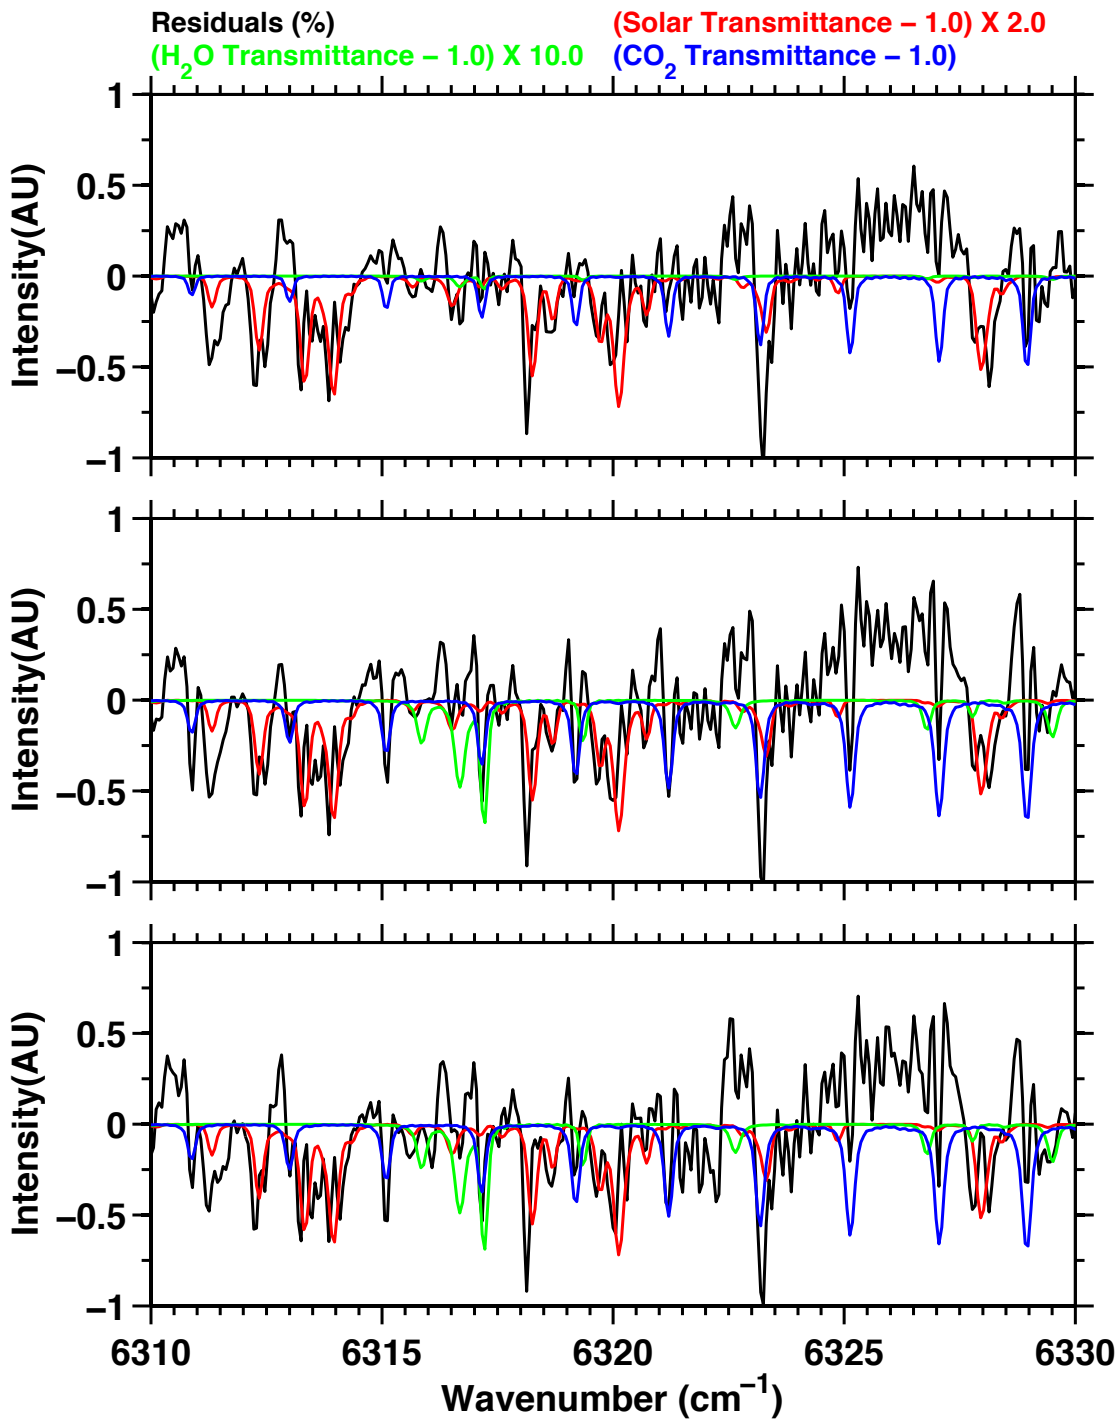

1

2 **Supplemental Material Figure 3.** Zoom-in view of MW6339 spectral fitting residuals (black  
 3 curve) and scaled transmittances of solar spectrum (red curve), major interfering trace gases  
 4 (green curve: H<sub>2</sub>O spectral features), and CO<sub>2</sub> spectral features (blue curve) within the  
 5 spectral segments. (top panels) for the measurements over CLARS site; (middle panels) for  
 6 the measurements along the light path of pointing at the Santa Anita Race Track; and (bottom  
 7 panels) for the measurements along the light path of pointing at the west Pasadena.

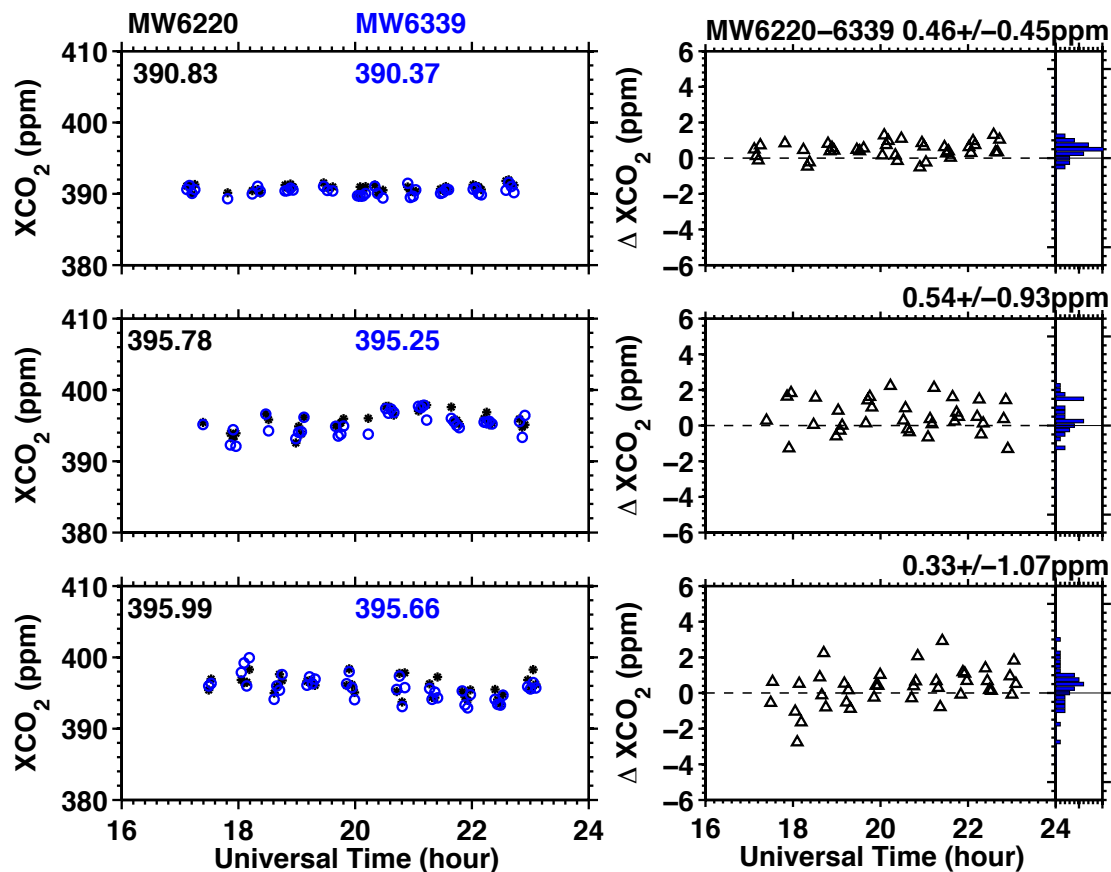

1  
2 **Supplemental Material Figure 4.** XCO<sub>2</sub> (in parts per million (ppm)) measured by CLARS-  
3 FTS with MW6220 (black dots) and MW6339 (blue circles) on January 18<sup>th</sup>, 2013 (left  
4 panels) and differences of retrieved XCO<sub>2</sub> between the two spectral regions and the  
5 histograms (right panels) in the Spectralon® viewing geometry (top panels), towards the  
6 Arcadia Race Track (middle panels); and towards west Pasadena (bottom panels). Black stars  
7 in left panels: XCO<sub>2</sub> obtained using the spectral region of MW6220. Compared to the  
8 background levels of XCO<sub>2</sub> (top panels), XCO<sub>2</sub> over Arcadia Race Track (middle panels) and  
9 west Pasadena (bottom panels) show higher values (mean ART-SV: 4.91 ppm; mean WP-SV:  
10 5.23 ppm) and present stronger diurnal cycles than those measurements over CLARS site.  
11 The XCO<sub>2</sub> values retrieved from MW6220 are higher than those of MW6339. The mean  
12 differences between MW6220 and MW6339 are 0.46 ppm, 0.54 ppm, and 0.33 ppm for SV,  
13 ART and WP measurements respectively. It was also appeared in the spectral analyses of the  
14 TCCON measurements (~0.15 ppm). Both CLARS-FTS and TCCON results, which are using  
15 HITRAN 2008 line list, show improvements on the band-to-band consistency of XCO<sub>2</sub>,  
16 compared to those of using HITRAN 2004 line list such as Figure 6 of Washenfelder et al.  
17 (2006) with the XCO<sub>2</sub> using MW6220 about 0.9 ppm higher than that of MW6339. These  
18 systematic differences of retrieved XCO<sub>2</sub> values between two spectral bands are likely arisen  
19 from the discrepancies of spectroscopic parameters between two spectral bands and the  
20 amount/intensity of spectral features of interfering species.

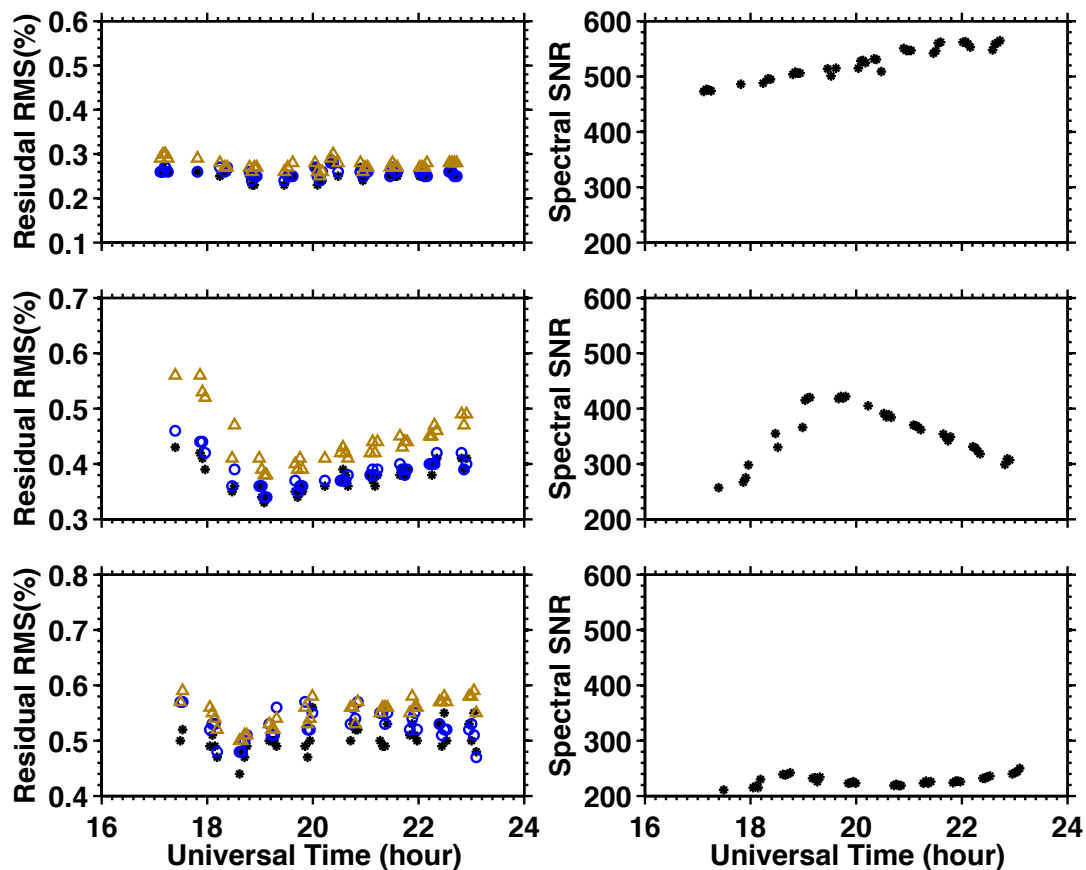

1  
 2 **Supplemental Material Figure 5.** Root Mean Square (RMS) of spectral fitting residuals  
 3 (Left panels) and spectral SNR (Right panels) for CO<sub>2</sub> slant column density measurements as  
 4 a function of time in Spectralon® viewing geometry (Top panels); over the Arcadia Race  
 5 Track (Middle panels); over west Pasadena (Bottom panels). Three spectral bands centered at  
 6 6220 cm<sup>-1</sup> (black stars, noted as MW6220 thereafter), 6339 cm<sup>-1</sup> (blue circles, noted as  
 7 MW6339 thereafter) and 7885 cm<sup>-1</sup> (gold triangles, noted as MW7885 thereafter) are  
 8 presented, respectively. The spectral SNR were nearly identical over the three spectral bands.  
 9 The measurements were performed on January 18<sup>th</sup>, 2013. The spectral fitting residuals were  
 10 normalized by the spectral continuum levels prior to the computation of RMS values. The  
 11 spectral fitting residuals were dominated by the photon shot noise. The RMS of the spectral  
 12 fitting residuals in both CO<sub>2</sub> bands are reasonably close to the expected values. The Chi-  
 13 squared tests of spectral fitting residuals yielded values generally within 1.3.

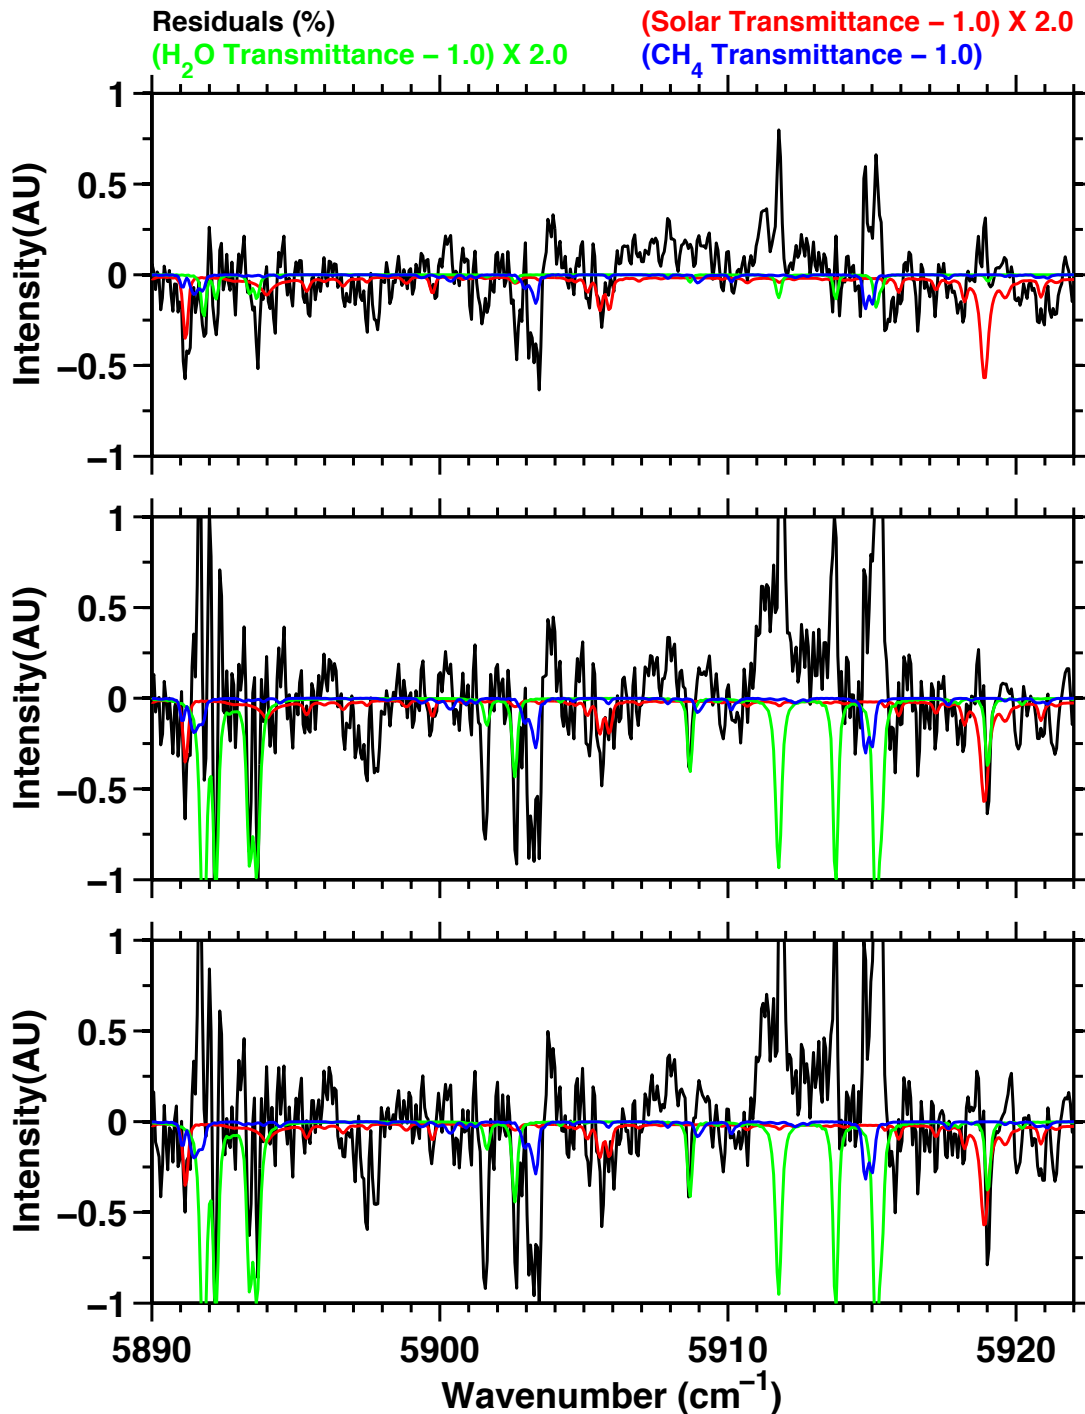

1  
 2 **Supplemental Material Figure 6.** Zoom-in view of MW5938 spectral fitting residuals (black  
 3 curve) and scaled transmittances of solar spectrum (red curve), major interfering trace gases  
 4 (green curve: H<sub>2</sub>O spectral features), and CH<sub>4</sub> spectral features (blue curve) within the  
 5 spectral segments. (Top panels) for the measurements over CLARS site; (middle panels) for  
 6 the measurements along the light path of pointing at the Santa Anita Race Track; and (bottom  
 7 panels) for the measurements along the light path of pointing at the west Pasadena.

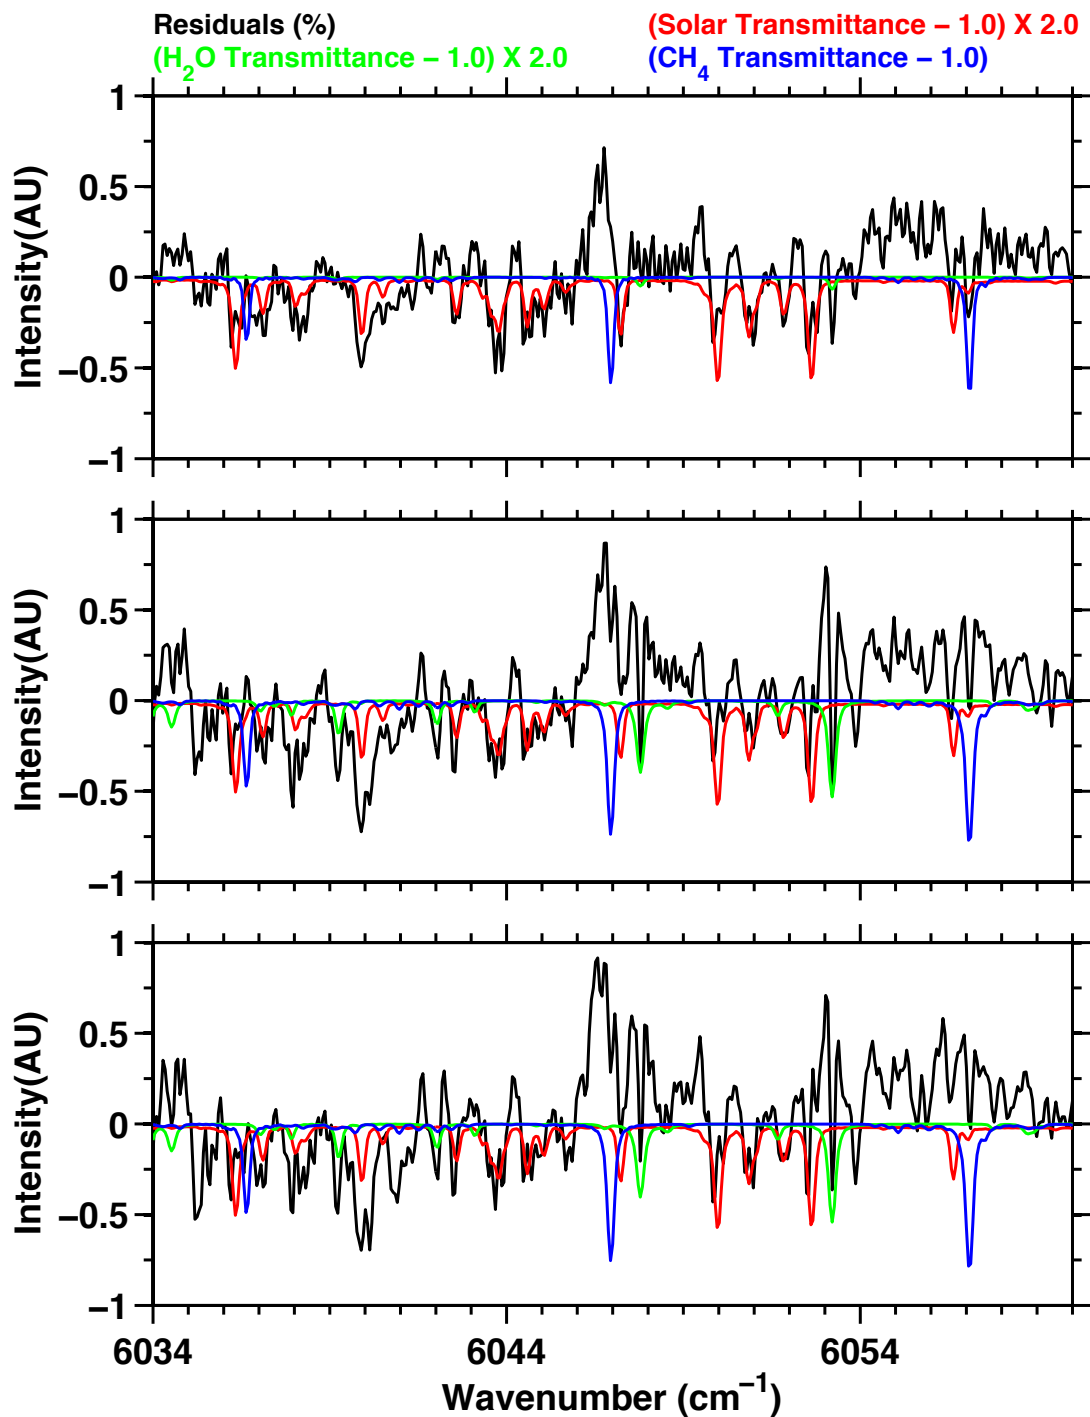

1  
 2 **Supplemental Material Figure 7.** Zoom-in view of MW6076 spectral fitting residuals (black  
 3 curve) and scaled transmittances of solar spectrum (red curve), major interfering trace gases  
 4 (green curve: H<sub>2</sub>O spectral features) ), and CH<sub>4</sub> spectral features (blue curve) within the  
 5 spectral segments. (Top panels) for the measurements over CLARS site; (middle panels) for  
 6 the measurements along the light path of pointing at the Santa Anita Race Track; and (bottom  
 7 panels) for the measurements along the light path of pointing at the west Pasadena.



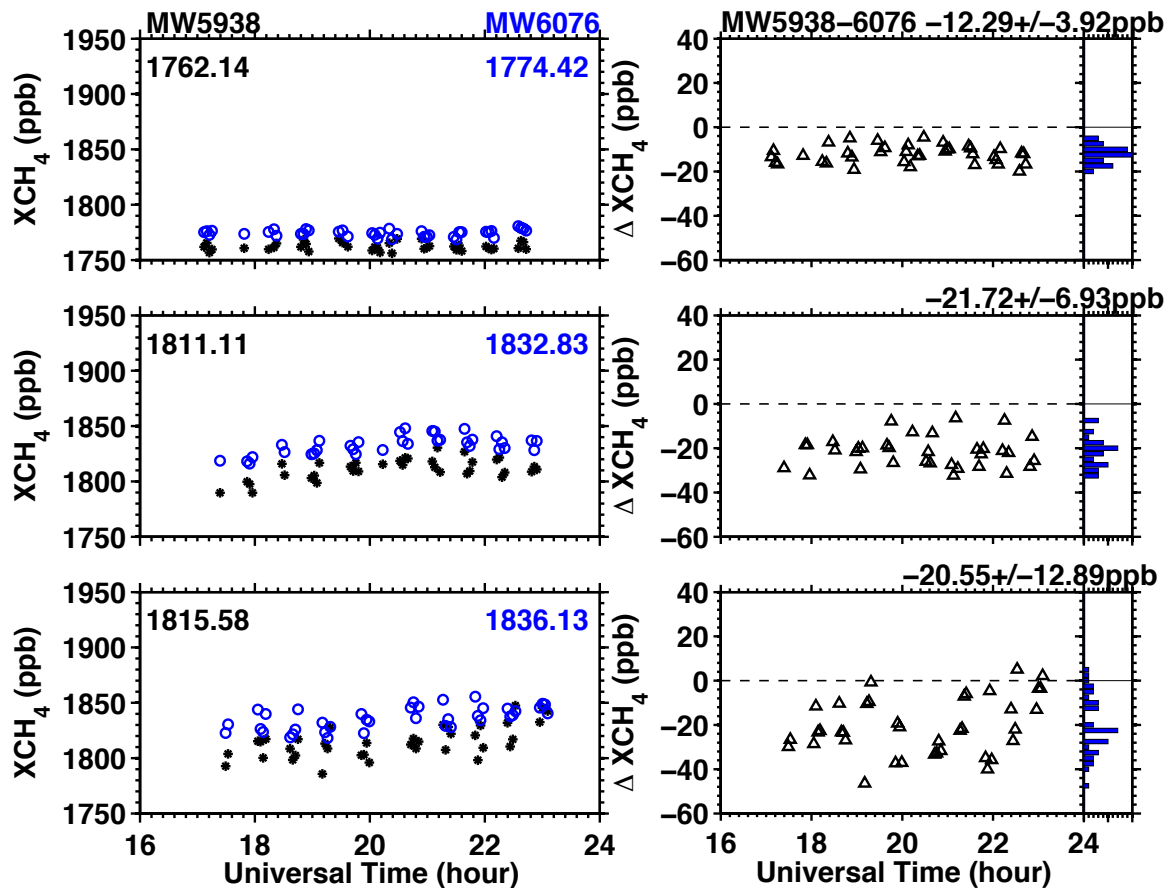

1

2 **Supplemental Material Figure 8.** XCH<sub>4</sub> (in parts per billion (ppb)) measured by CLARS-  
3 FTS with MW5938 (black dots) and MW6076 (blue circles) on January 18<sup>th</sup>, 2013 (left  
4 panels) and differences of retrieved XCH<sub>4</sub> between the two spectral regions and the  
5 histograms (right panels) in the Spectralon® Viewing geometry (top panels), towards the  
6 Arcadia Race Track (middle panels); and towards west Pasadena (bottom panels). Black stars  
7 in left panels: XCH<sub>4</sub> obtained using the spectral region of MW5938. Compared to the  
8 background levels of XCH<sub>4</sub> (top panels), XCH<sub>4</sub> over Arcadia Race Track (middle panels) and  
9 west Pasadena (bottom panels) show higher values (mean ART-SV: 53.69 ppb; mean WP-  
10 SV: 57.58 ppb) and present stronger diurnal cycles than those measurements over CLARS  
11 site. The XCH<sub>4</sub> values retrieved from MW6076 are higher than those of MW5938. The mean  
12 differences between MW6076 and MW5938 are 12.29 ppb, 21.72 ppb, and 20.55 ppb for SV,  
13 ART and WP respectively. These systematic differences of retrieved XCH<sub>4</sub> values between  
14 two spectral bands are likely arisen from the discrepancies of spectroscopic parameters  
15 between two spectral bands and the amount/intensity of spectral features of interfering  
16 species.

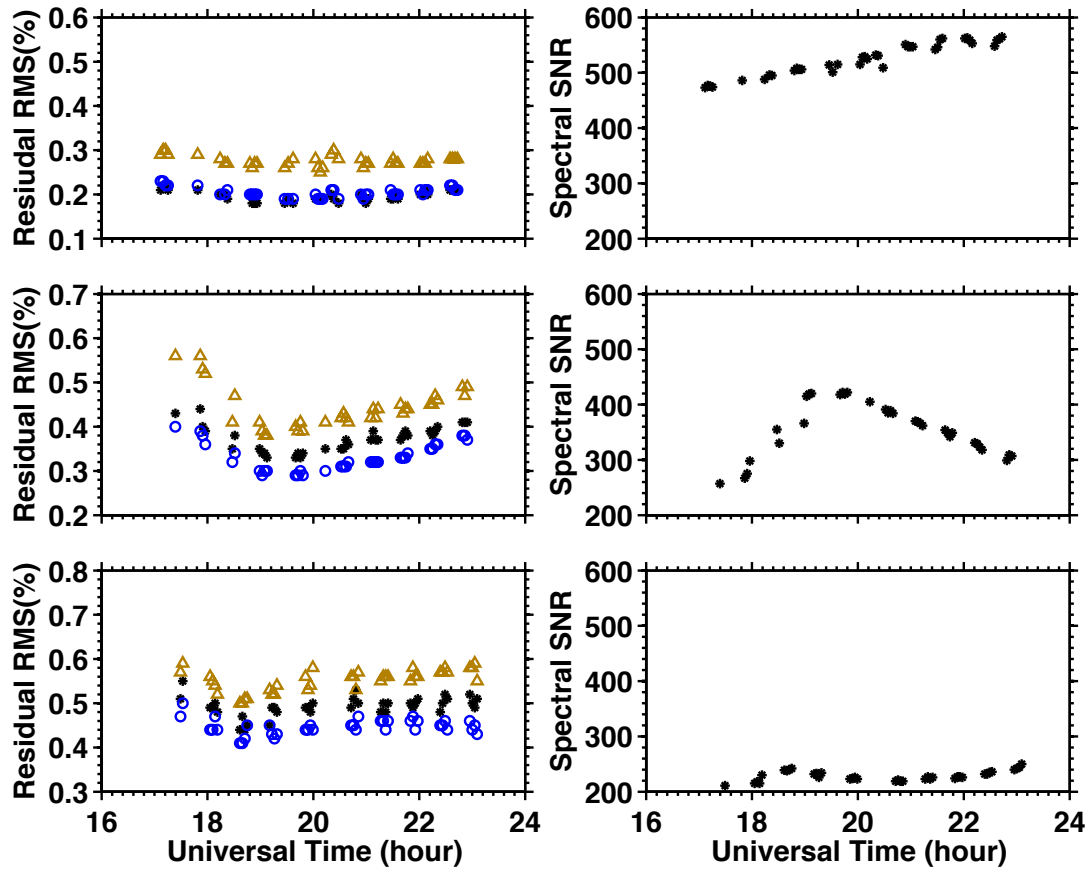

1

2 **Supplemental Material Figure 9.** Root Mean Square (RMS) of spectral fitting residuals (left  
3 panels) and spectral SNR (right panels) as a function of time for the measurements of CH<sub>4</sub>  
4 and O<sub>2</sub> column densities in Spectralon® viewing geometry (top panels); over the Arcadia  
5 Race Track (middle panels); over west Pasadena (bottom panels). Three spectral bands  
6 centered at 5938 cm<sup>-1</sup> (black stars, noted as MW5938 thereafter), 6076 cm<sup>-1</sup> (blue circles,  
7 noted as MW6076 thereafter) and 7885 cm<sup>-1</sup> (gold triangles, noted as MW7885 thereafter)  
8 are presented, respectively. The spectral SNR were nearly identical over the three spectral bands  
9 within a measured spectrum, but varies among spectra. The measurements were performed on  
10 January 18<sup>th</sup>, 2013. The spectral fitting residuals were normalized by the spectral continuum  
11 levels prior to the computation of RMS values. The spectral fitting residuals were dominated  
12 by the photon shot noise since the RMS of the spectral fitting residuals in both CH<sub>4</sub> bands are  
13 reasonably close to the expected values, i.e., 1/(spectral SNR). The Chi-squared tests of  
14 spectral fitting residuals yielded values generally within 1.3.

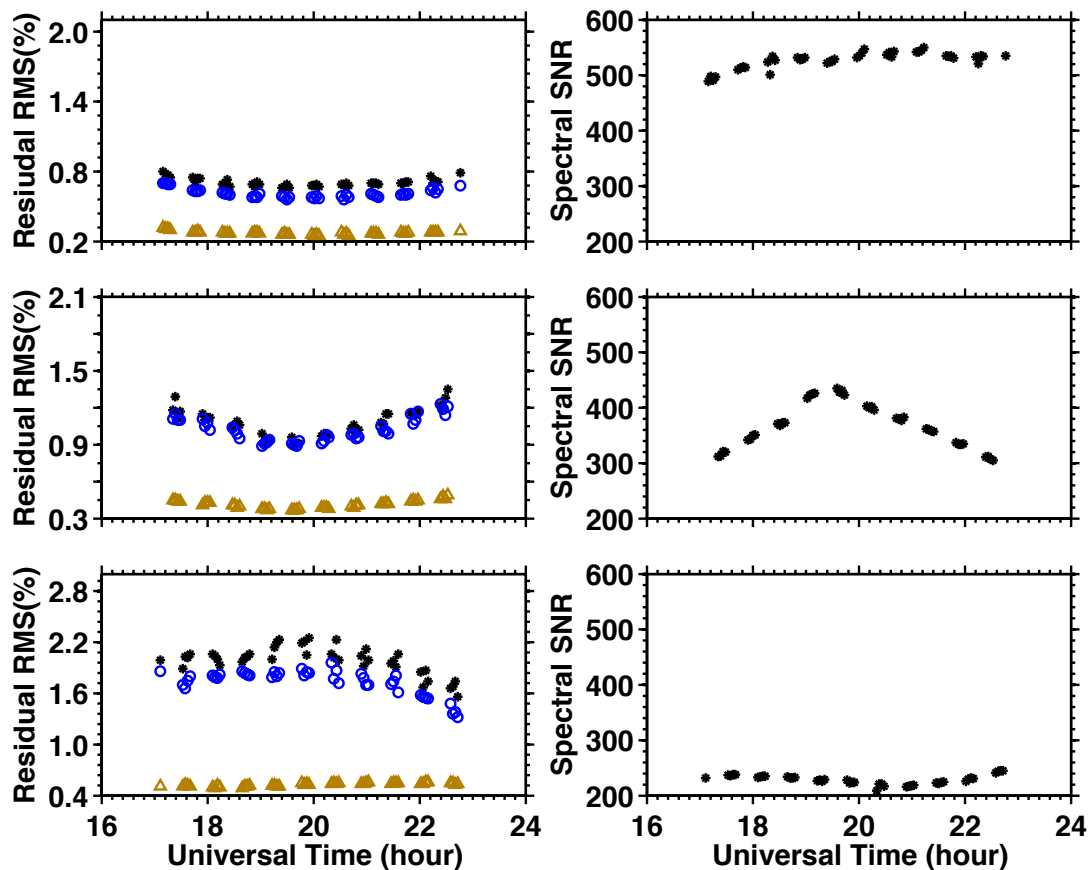

1  
2 **Supplemental Material Figure 10.** Root Mean Square (RMS) of spectral fitting residuals  
3 (left panels) and spectral SNR (right panels) as a function of time for the measurements of CO  
4 and O<sub>2</sub> column densities in Spectralon® viewing geometry (top panels); over the Arcadia  
5 Race Track (middle panels); over west Pasadena (bottom panels). Three spectral regions near  
6 2.36 μm centered at 4233 cm<sup>-1</sup> (black stars, noted as MW4233 thereafter), 4290 cm<sup>-1</sup> (blue  
7 circles, noted as MW4290 thereafter) and O<sub>2</sub> band near 1.2 μm centered at 7885 cm<sup>-1</sup> (gold  
8 triangles, noted as MW7885 thereafter) are presented, respectively. The spectral SNR were  
9 nearly identical over the three spectral bands within a measured spectrum, but varies among  
10 spectra. The measurements were performed on January 3<sup>rd</sup>, 2013. The spectral fitting  
11 residuals were normalized by the spectral continuum levels prior to the computation of RMS  
12 values. The strong absorption of interfering gases other than CO gas in MW4233 and MW4290  
13 made spectral fitting residuals be larger than that of CO<sub>2</sub>, CH<sub>4</sub>, and O<sub>2</sub>. Previous studies  
14 reported similar phenomena.

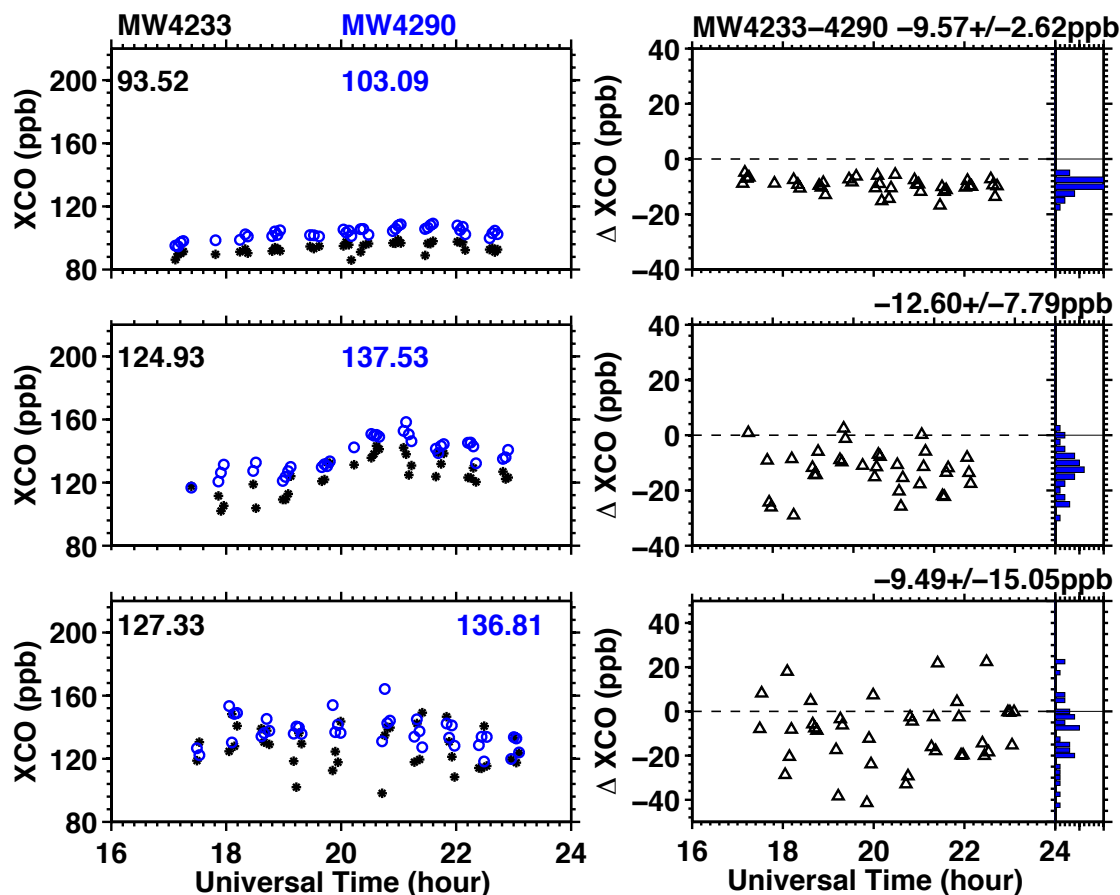

1  
2 **Supplemental Material Figure 11.** XCO (in parts per billion (ppb)) measured by CLARS-  
3 FTS with MW4233 (black dots) and MW4290 (blue circles) on January 18<sup>th</sup>, 2013 (left  
4 panels) and differences of retrieved XCO between the two spectral regions and the histograms  
5 (right panels) in the Spectralon® viewing geometry (top panels), towards the Arcadia Race  
6 Track (middle panels); and towards west Pasadena (bottom panels). Compared to the  
7 background levels of XCO (top panels), XCO over Arcadia Race Track (middle panels) and  
8 west Pasadena (bottom panels) show higher values (mean ART-SV: 32.93 ppb; mean WP-  
9 SV: 33.77 ppb) and present stronger diurnal cycles than those measurements over CLARS  
10 site. The XCO values retrieved from MW4290 are higher than those of MW4233. The mean  
11 differences between MW4290 and MW4233 are 9.57 ppb, 12.60 ppb, and 9.49 ppb for SV,  
12 ART and WP respectively. These systematic differences of retrieved XCO values between  
13 two spectral bands are likely arisen from the discrepancies of spectroscopic parameters  
14 between two spectral bands and the amount/intensity of spectral features of interfering  
15 species.
